IN-ST239-2 and 47 in IN-ST368-5, compared with 24 genes in IN-ST239-7) and the presence of plasmid *rep24*, which has been previously described in community-associated MRSA strains (pWBG745).<sup>15</sup>

To conclude, this study highlights the SCCmec region in the Indian ST239 clone as subject to recombination events that were evidenced by the formation of the largest SCCmec III composite element reported so far.

### Genome accession numbers

The sequences of the five MRSA strains sequenced in this study were submitted to NCBI under BioProject accession number PRJNA316797. SCCmec STs and subtypes used for comparison (<http://www.sccmec.org/>) and downloaded from NCBI were: SCCmec I, AB033763.2; SCCmec IIa, D86934.2; SCCmec IIb, AB127982.1; SCCmec III, AB037671.1; SCCmec IVa, AB063172.2; SCCmec IVb, AB063173.1; SCCmec IVc, AB096217.1; SCCmec IVd, AB097677.1; SCCmec IVe, AJ810121.1; SCCmec IVg, DQ106887.1; SCCmec V, AB121219; SCCmec VT, AY894416.1; and SCCmec VI, AF411935.3.

### Funding

This work was supported by European Horizon 2020 project 'Collaborative management platform for detection and analyses of (re-) emerging and foodborne outbreaks in Europe' (COMPARE; grant agreement no. 643476). J. C. was supported by University of Antwerp doctoral assistant funds. B. B. X. was supported by University of Antwerp research funds (BOF-DOCPRO 2012-27450) and COMPARE. L. V. was supported by a short-stay research grant from the Flemish Interuniversity Council (VLIR-UOS). S. D. B. is supported by doctoral funding from Research Foundation Flanders (FWO-F, applicant number 1128818N).

### Transparency declarations

None to declare.

### References

- Lee AS, de Lencastre H, Garau J *et al.* Methicillin-resistant *Staphylococcus aureus*. *Nat Rev Dis Primers* 2018; **4**: 18033.
- Tahnkiwale SS, Roy S, Jalgaonkar SV. Methicillin resistance among isolates of *Staphylococcus aureus*: antibiotic sensitivity pattern & phage typing. *Indian J Med Sci* 2002; **56**: 330–4.
- Verma S, Joshi S, Chitnis V *et al.* Growing problem of methicillin resistant staphylococci—Indian scenario. *Indian J Med Sci* 2000; **54**: 535–40.
- Neetu TJ, Murugan S. Genotyping of methicillin resistant *Staphylococcus aureus* from tertiary care hospitals in Coimbatore, South India. *J Global Infect Dis* 2016; **8**: 68–74.
- De Backer S, Xavier BB, Vanjari L. *et al.* Remarkable geographical variations between India and Europe in carriage of the staphylococcal surface protein-encoding *saxX/sesI* and in the population structure of methicillin-resistant *Staphylococcus aureus* belonging to clonal complex 8. *Clin Microbiol Infect* 2018; doi:10.1016/j.cmi.2018.07.024.
- Clinical and Laboratory Standards Institute. *Performance Standards for Antimicrobial Susceptibility Testing: Twenty-Sixth Edition M100-S26*. CLSI, Wayne, PA, USA, 2016.
- Chaudhari NM, Gupta VK, Dutta C. BPGA- an ultra-fast pan-genome analysis pipeline. *Sci Rep* 2016; **6**: 24373.
- Corrigan RM, Rigby D, Handley P *et al.* The role of *Staphylococcus aureus* surface protein SasG in adherence and biofilm formation. *Microbiology* 2007; **153**: 2435–46.
- Josefsson E, Juuti K, Bokarewa M *et al.* The surface protein Pls of methicillin-resistant *Staphylococcus aureus* is a virulence factor in septic arthritis. *Infect Immun* 2005; **73**: 2812–7.
- Kaufmann G. Anticodon nucleases. *Trends Biochem Sci* 2000; **25**: 70–4.
- Altschul SF, Gish W, Miller W *et al.* Basic local alignment search tool. *J Mol Biol* 1990; **215**: 403–10.
- Goering RV, Morrison D, Al-Doori Z *et al.* Usefulness of *mec*-associated direct repeat unit (*dru*) typing in the epidemiological analysis of highly clonal methicillin-resistant *Staphylococcus aureus* in Scotland. *Clin Microbiol Infect* 2008; **14**: 964–9.
- Smit A, Hubley R, Green P. *RepeatMasker Open-4.0*. <http://www.repeatmasker.org>.
- Rahn A, Beis K, Naismith JH *et al.* A novel outer membrane protein, Wzi, is involved in surface assembly of the *Escherichia coli* K30 group 1 capsule. *J Bacteriol* 2003; **185**: 5882–90.
- Rossi F, Diaz L, Wollam A *et al.* Transferable vancomycin resistance in a community-associated MRSA lineage. *N Engl J Med* 2014; **370**: 1524–31.

*J Antimicrob Chemother* 2019; **74**: 266–269  
doi:10.1093/jac/dky381  
Advance Access publication 5 October 2018

## Emergence of *Escherichia coli* ST131 H30/H30-Rx subclones in companion animals

Adriana Belas, Cátia Marques , Catarina Aboim and Constança Pomba \*

*Interdisciplinary Centre of Research in Animal Health, Faculty of Veterinary Medicine, University of Lisbon, Av. da Universidade Tecnica, 1300-477 Lisbon, Portugal*

\*Corresponding author. E-mail: cpomba@fmv.ulisboa.pt  [orcid.org/0000-0002-0504-6820](https://orcid.org/0000-0002-0504-6820)

Sir,

The *Escherichia coli* O25b-ST131, with its fluoroquinolone-resistant H30 subclone and its nested ESBL CTX-M-15-associated H30-Rx subclone, is the most disseminated MDR and virulent *E. coli* clonal group worldwide.<sup>1</sup> In previous work, we have reported the

**Table 1.** Characterization of *E. coli* O25b:H4-B2-ST131 H30 and H30-Rx subclones isolated from companion animals

| Isolate    | Year | Companion animal origin | Clonal group ST131 | Subclone H30 | Subclone H30-Rx | Antimicrobial resistance <sup>a</sup>               | ESBL and/or pAmpC genes | Other resistance genes                                            | PAIs                                                                                                              | Virotype <sup>b</sup> | Virulence genes                         |
|------------|------|-------------------------|--------------------|--------------|-----------------|-----------------------------------------------------|-------------------------|-------------------------------------------------------------------|-------------------------------------------------------------------------------------------------------------------|-----------------------|-----------------------------------------|
| FMV2358/03 | 2003 | dog                     | yes                | yes          | no              | AMP-TET-CIP-ENR                                     | no                      | —                                                                 | PAI <sub>I1536</sub> -PAI <sub>I196</sub> -PAI <sub>Iv536</sub> -PAI <sub>IICFT073</sub>                          | D                     | ecpA-hlyA-cnfl-sfaDE-papEF-papGIII-iucD |
| FMV5825/04 | 2004 | dog                     | yes                | yes          | yes             | AMP-AMC-CEF-CTX-CAZ-FOX-SXT-TET-CIP-ENR-GEN-AMK-TOB | bla <sub>CTX-M-15</sub> | bla <sub>TEM</sub> -bla <sub>OXA-1-sulI</sub> -aac(6)-Ib-cr-qnrB2 | PAI <sub>I1536</sub> -PAI <sub>I196</sub> -PAI <sub>IICFT073</sub> -PAI <sub>Iv536</sub> -PAI <sub>IICFT073</sub> | D                     | ecpA-hlyA-cnfl-sfaDE-papEF-iucD         |
| FMV2777/08 | 2008 | cat                     | yes                | yes          | yes             | AMP-AMC-CEF-CTX-CAZ-TET-CIP-ENR-GEN-TOB             | bla <sub>CTX-M-15</sub> | sac(6)-Ib-cr                                                      | PAI <sub>IICFT073</sub> -PAI <sub>Iv536</sub> -PAI <sub>IICFT073</sub>                                            | D                     | ecpA-hlyA-papEF-iucD                    |
| FMV6710/08 | 2008 | dog                     | yes                | yes          | no              | AMP-SXT-CIP-ENR                                     | no                      | sul2                                                              | PAI <sub>IICFT073</sub> -PAI <sub>Iv536</sub> -PAI <sub>IICFT073</sub>                                            | D                     | ecpA-hlyA-papEF-iucD                    |
| FMV5695/09 | 2009 | dog                     | yes                | yes          | no              | AMP-TET-CIP-ENR                                     | no                      | bla <sub>TEM</sub> -oqxAB                                         | PAI <sub>Iv536</sub> -PAI <sub>IICFT073</sub>                                                                     | D                     | ecpA-papEF-iucD                         |
| FMV58/13   | 2013 | cat                     | yes                | yes          | yes             | AMP-CEF-CTX-SXT-CIP-ENR                             | bla <sub>CTX-M-1</sub>  | bla <sub>TEM</sub> -dfrAI-sac(6)-Ib-cr                            | PAI <sub>IICFT073</sub> -PAI <sub>Iv536</sub> -PAI <sub>IICFT073</sub>                                            | D                     | ecpA-hlyA-sfaDE-papEF-iucD              |
| FMV146/14  | 2014 | dog                     | yes                | yes          | no              | AMP-TET-CIP-ENR                                     | no                      | sac(6)-Ib-cr                                                      | PAI <sub>I1536</sub> -PAI <sub>IICFT073</sub> -PAI <sub>Iv536</sub>                                               | D                     | ecpA-hlyA-papEF-afABC-iucD              |

AMC, amoxicillin/clavulanate; AMP, ampicillin; AMK, amikacin; CAZ, ceftazidime; CIP, ciprofloxacin; GEN, gentamicin; CTX, cefotaxime; ENR, enrofloxacin; FOX, ceftiofur; SXT, trimethoprim/sulfamethoxazole; TET, tetracycline; TOB, tobramycin; CEF, cefalotin; pAmpC, plasma-mediated AmpC.

<sup>a</sup>Susceptibility was accessed according to CLSI M100-S27.

<sup>b</sup>Classification of the virotype was in accordance with Nicolas-Chanoine *et al.*<sup>1</sup>

first detection of this O25b-ST131 clone causing urinary tract infection (UTI) in a dog.<sup>2</sup> Additionally, later on, we found within-lineage variability of ST131 *E. coli* UTI isolates from humans and companion animals by PFGE analysis.<sup>3</sup> The detection of human high-risk pandemic *E. coli* clones causing UTI in companion animals is a great public health concern.<sup>4</sup>

Between 1999 and 2015, 342 uropathogenic *E. coli* were isolated at the Laboratory of Antimicrobial Resistance, Faculty of Veterinary Medicine, University of Lisbon from companion animals (dogs and cats) with UTI. Significant bacteriuria was determined based on a quantitative urine culture according to the urine collection method used (puncture, catheter or free catch). Urine samples were collected from companion animals at the teaching hospital of the Faculty of Veterinary Medicine and at private veterinary hospitals in Lisbon, Portugal.

All B2 phylogroup isolates were studied by PCR for the ST131-associated SNP in the *mdh* and *gyrB* genes;<sup>5</sup> 14.5% ( $n = 25/172$ ) were the pandemic O25b:H4-B2-ST131 clone. The *E. coli* O25b:H4-B2-ST131 H30 and H30-Rx subclones were screened by PCR as previously described.<sup>6</sup> Seven ( $n = 7/25$ ; 28%) of the O25b:H4-B2-ST131 clone companion animal isolates were the H30 subclone and three out of these seven were the H30-Rx subclone (Table 1). To the best of our knowledge this is the first report of *E. coli* ST131 H30/H30-Rx subclones causing UTI in companion animals in Europe.

The presence of uropathogenic *E. coli* (UPEC) virotype markers was assessed, i.e. Pap fimbriae (*papEF* operon segment), Sfa fimbriae and Afa afimbrial adhesin (*sfa* and *afa* genes, respectively), the *hlyA* gene from the  $\alpha$ -haemolysin operon, cytotoxic necrotizing factor 1 (*cnf1* gene), aerobactin siderophore (*iucD* gene), *E. coli* common pilus (*ecpA* gene) and the uropathogenic specific protein (*usp* gene).<sup>7,8</sup> The distribution of alleles I, II and III of the P adhesin gene *papG* was studied.<sup>9</sup>

Additionally, pathogenicity-associated islands (PAIs) (PAI<sub>IV536</sub>, PAI<sub>I536</sub>, PAI<sub>II536</sub>, PAI<sub>III536</sub>, PAI<sub>IJ96</sub>, PAI<sub>IIJ96</sub>, PAI<sub>ICFT073</sub>, PAI<sub>IICFT073</sub>) were identified.<sup>10</sup> The *E. coli* O25b:H4-B2-ST131-H30/H30-Rx most common pathogenicity and virulence-associated gene profiles were PAI<sub>ICFT073</sub>-PAI<sub>IV536</sub>-PAI<sub>IICFT073</sub> (42.9%,  $n = 3/7$ ) and *ecpA-hlyA-papEF-iucD* (28.6%,  $n = 2/7$ ), respectively. The full pathogenicity and virulence genotype of *E. coli* O25b:H4-B2-ST131-H30/H30-Rx is shown in Table 1. All H30/H30-Rx subclones causing UTI in companion animals belonged to virotype D, which confirms their virulent characteristics.<sup>1</sup>

Resistance to third-generation cephalosporins was detected only in the three isolates of the H30-Rx subclone.  $\beta$ -Lactamase genes were screened as reported elsewhere.<sup>2</sup> As expected from other studies, O25b:H4-B2-ST131 H30 and H30-Rx isolates were fluoroquinolone resistant,<sup>1</sup> yet one O25b:H4-B2-ST131-H30-Rx *E. coli* did not carry the ESBL *bla*<sub>CTX-M-15</sub>, but instead carried the frequent *bla*<sub>CTX-M-1</sub> gene, which is associated with *E. coli* isolates of farm animal origin and recently described in humans in Turkey with UTI.<sup>1,11</sup> The mechanism of resistance to other antimicrobial classes was characterized by PCR and nucleotide sequencing for *sul1*, *sul2*, *sul3*, *dfra1*, *dfra12* and the plasmid-mediated quinolone resistance (PMQR) genes [*qnrA*, *qnrB*, *qnrS*, *qnrC*, *qnrD*, *qepA*, *aac(6')-Ib* and the MDR *oqxAB* genes of the efflux pump].<sup>12</sup> The *aac(6')-Ib-cr* gene was the most common PMQR gene detected (57.1%,  $n = 4/7$ ) and was more frequently found in ST131 H30-Rx *E. coli* isolates than in ST131 H30 isolates. The *qnrB2* and *aac(6')*

*Ib-cr* genes were detected in the FMV5825/04 dog isolate as expected from previous data (Table 1).<sup>2</sup>

In Europe, carbadox and olaquinox, which are quinoxaline derivatives with antibacterial properties, were used for the prevention of dysentery and as growth promoters in pigs since 1974 and 1976, respectively. Fortunately, their use has been banned in farm animals in Europe for decades, but not in China.<sup>13</sup> The efflux pump OqxAB also extrudes antibiotics such as chloramphenicol and fluoroquinolones. Isolate FMV5695/09 O25b:H4-B2-ST131-H30 harboured both *oqxA* and *oqxB* efflux pump genes, which could potentially be related to the reduced fluoroquinolone susceptibility. To the best of our knowledge, this is the first description of an ST131 *E. coli* harbouring the *oqxAB* efflux pump. Further studies will be necessary to elucidate the importance of this resistance mechanism in the ST131 pandemic *E. coli* clone.

This study reports the detection and frequency of the *E. coli* O25b:H4-B2-ST131 H30/H30-Rx subclones in companion animals with UTI in Portugal and, to the best of our knowledge, in Europe. In conclusion, the findings presented in this study are relevant and, to the best of our knowledge, represent the first detection of ST131 H30/H30-Rx *E. coli* isolates associated with UTI in companion animals in Europe. To the best of our knowledge, this is the first report in Europe of the disseminated *E. coli* O25b:H4-B2-ST131-H30/H30-Rx, MDR, fluoroquinolone-resistant human high-risk clone and its CTX-M-15-H30-Rx and CTX-M-1-H30-Rx subsets in companion animals with UTI. Studies of ST131 H30/H30-Rx in humans in Portugal are scarce, yet H30/H30-Rx subclones have been described in faecal samples in healthy humans.<sup>14</sup> These results raise public health concerns since these subclones may have an impact on human health through the close and direct contact between companion animals and owners. Moreover, the close contact between companion animals and humans creates opportunities for interspecies transmission of resistant bacteria.

## Acknowledgements

We are grateful to Vincent Perreten for the gift of the *sul3*-harbouring *E. coli* strain.

## Funding

This work was supported by Fundo Europeu de Desenvolvimento Regional (FEDER) funds through the Programa Operacional Factores de Competitividade (COMPETE) and by National funds through the Fundação para a Ciência e a Tecnologia (FCT) [CIISA Project UID/CVT/00276/2013 and PET-Risk Consortium Project Joint Programming Initiative on Antimicrobial Resistance (JPIAMR/0002/2016)]. Adriana Belas (SFRH/BD/113142/2015) and Cátia Marques (SFRH/BD/77886/2011) hold FCT PhD grants.

## Transparency declarations

None to declare.

## References

- Nicolas-Chanoine MH, Bertrand X, Madec JY. *Escherichia coli* ST131, an intriguing clonal group. *Clin Microbiol Rev* 2014; **27**: 543–74.

- 2 Pomba C, da Fonseca JD, Baptista BC *et al.* Detection of the pandemic O25-ST131 human virulent *Escherichia coli* CTX-M-15-producing clone harboring the *qnrB2* and *aac(6')-Ib-cr* genes in a dog. *Antimicrob Agents Chemother* 2009; **53**: 327–8.
- 3 Pomba C, López-Cerero L, Bellido M *et al.* Within-lineage variability of ST131 *Escherichia coli* isolates from humans and companion animals in the south of Europe. *J Antimicrob Chemother* 2014; **69**: 271–3.
- 4 Pomba C, Rantala M, Greko C *et al.* Public health risk of antimicrobial resistance transfer from companion animals. *J Antimicrob Chemother* 2017; **72**: 957–68.
- 5 Johnson JR, Menard M, Johnston B *et al.* Epidemic clonal groups of *Escherichia coli* as a cause of antimicrobial-resistant urinary tract infections in Canada, 2002–2004. *Antimicrob Agents Chemother* 2009; **53**: 2733–9.
- 6 Banerjee R, Robicsek A, Kuskowski MA *et al.* Molecular epidemiology of *Escherichia coli* sequence type 131 and its H30 and H30-Rx subclones among extended-spectrum- $\beta$ -lactamase-positive and -negative *E. coli* clinical isolates from the Chicago region, 2007 to 2010. *Antimicrob Agents Chemother* 2013; **57**: 6385–8.
- 7 Féria C, Machado J, Correia JD *et al.* Virulence genes and P fimbriae PapA subunit diversity in canine and feline uropathogenic *Escherichia coli*. *Vet Microbiol* 2001; **82**: 81–9.
- 8 Narciso A, Nunes F, Amores T *et al.* Persistence of uropathogenic *Escherichia coli* strains in the host for long periods of time: relationship between phylogenetic groups and virulence factors. *Eur J Clin Microbiol Infect Dis* 2012; **31**: 1211–7.
- 9 Johnson J. *papG* alleles among *Escherichia coli* strains causing urosepsis: associations with other bacterial characteristics and host compromise. *Infect Immun* 1998; **66**: 4568–71.
- 10 Sabaté M, Moreno E, Pérez T *et al.* Pathogenicity island markers in commensal and uropathogenic *Escherichia coli* isolates. *Clin Microbiol Infect* 2006; **12**: 880–6.
- 11 Can F, Kurt-Azap Ö, İspir P *et al.* The clinical impact of ST131 H30-Rx subclone in urinary tract infections due to multidrug-resistant *Escherichia coli*. *J Glob Antimicrob Resist* 2016; **4**: 49–52.
- 12 Kim HB, Wang M, Park CH *et al.* *oqxAB* encoding a multidrug efflux pump in human clinical isolates of Enterobacteriaceae. *Antimicrob Agents Chemother* 2009; **53**: 3582–4.
- 13 Liu B, Wu H, Zhai Y *et al.* Prevalence and molecular characterization of *oqxAB* in clinical *Escherichia coli* isolates from companion animals and humans in Henan Province, China. *Antimicrob Resist Infect Control* 2018; **7**: 18.
- 14 Rodrigues C, Machado E, Fernandes S *et al.* An update on faecal carriage of ESBL-producing Enterobacteriaceae by Portuguese healthy humans: detection of the H30 subclone of B2-ST131 *Escherichia coli* producing CTX-M-27. *J Antimicrob Chemother* 2016; **71**: 1120–2.

*J Antimicrob Chemother* 2019; **74**: 269–271  
doi:10.1093/jac/dky393  
Advance Access publication 8 October 2018

## Mechanisms of high-level ceftolozane/tazobactam resistance in *Pseudomonas aeruginosa* from a severely neutropenic patient and treatment success from synergy with tobramycin

Wonhee So<sup>1\*</sup>, James Shurko<sup>2,3</sup>, Ralph Galega<sup>2,3</sup>, Rod Quilitz<sup>1</sup>, John N. Greene<sup>1</sup> and Grace C. Lee<sup>2,3</sup>

<sup>1</sup>Moffitt Cancer Center, 12902 USF Magnolia Drive, Tampa, FL 33612, USA; <sup>2</sup>College of Pharmacy, The University of Texas at Austin, Austin, TX, USA; <sup>3</sup>School of Medicine, The University of Texas Health San Antonio, San Antonio, TX, USA

\*Corresponding author. Tel: +1-813-745-8529; Fax: +1-813-449-8900; E-mail: Wonhee.so@moffitt.org

Sir,  
We read the article by Fraile-Ribot *et al.*<sup>1</sup> with great interest and herein report another case of ceftolozane/tazobactam-resistant *Pseudomonas aeruginosa* bacteraemia that developed after 5 weeks of exposure to ceftolozane/tazobactam. A retrospective review of the medical records of a single patient case does not mandate review by the University of South Florida College of Medicine Institutional Review Board (IRB), thus informed consent was not required.

The patient had AML and was induced with cladribine, cytarabine, filgrastim plus mitoxantrone on days 1–6 then reinduced with 5 days of cladribine plus cytarabine on days 15–19. The patient had a long history of hidradenitis suppurativa with draining sinus tracts in the left axilla and perianal area at presentation. Upon neutropenic fever, oral ciprofloxacin was escalated to antipseudomonal  $\beta$ -lactams (Table 1). The first bacteraemia developed on day 25, despite being on 500 mg of meropenem every 6 h since day 7, then cleared on day 29 while on a combination of 500 mg of meropenem every 6 h, 750 mg of ciprofloxacin every 12 h and 7 mg/kg tobramycin every 24 h, which was later adjusted to 3 g of ceftolozane/tazobactam every 8 h plus 7 mg/kg tobramycin every 24 h when the susceptibility was finalized on day 30. The patient was discharged on day 47 with a plan to continue 4.5 g of ceftolozane/tazobactam over 24 h as a continuous infusion until absolute neutrophil count (ANC) >500 cells/mm<sup>3</sup> while the patient's ANC remained <100 cells/mm<sup>3</sup> until day 75. In the meantime, the patient was readmitted with neutropenic fever on day 59 and the second bacteraemia occurred on day 65 while on 1.5 g of ceftolozane/tazobactam every 8 h. With a combination of 3 g of ceftolozane/tazobactam every 8 h, given over 4 h, plus 7 mg/kg tobramycin every 24 h, bacteraemia was
